# Supplementary material for: A Cancer-Favoring, Engineered Vaccinia Virus for Cholangiocarcinoma
Source: PubMed Central journal article supplement (PMC6896061; doi:10.3390/cancers11111667), 2019-10-27
Supplement: cancers-11-01667-s001.pdf [file cancers-11-01667-s001.pdf]

## Supplementary Materials

# A Cancer-Favoring Engineered Vaccinia Virus for Cholangiocarcinoma

So Young Yoo, Narayanasamy Badrinath, Hye Lim Lee, Jeong Heo and Dae-Hwan Kang

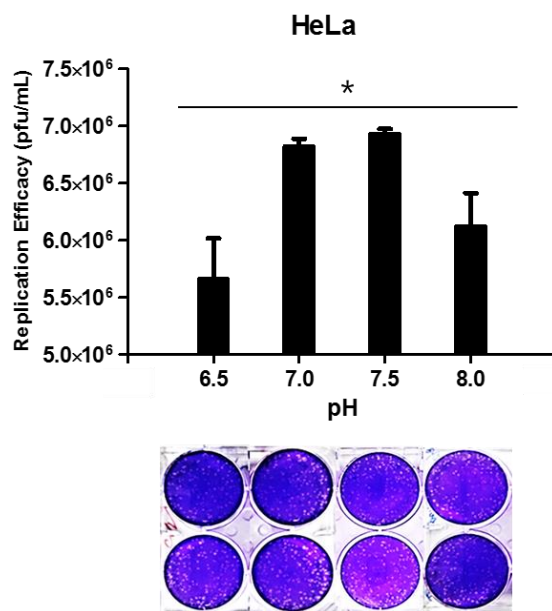

**Figure 1.** Replication efficacy in HeLa cultured in different pHs of media. \* $p < 0.05$ , one-way ANOVA.

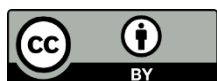

© 2019 by the authors. Submitted for possible open access publication under the terms and conditions of the Creative Commons Attribution (CC BY) license (<http://creativecommons.org/licenses/by/4.0/>).
